# Supplementary material for: A novel inhibitory BAK antibody enables assessment of non-activated BAK in cancer cells
Source: PubMed Central journal article supplement (PMC11164899; doi:10.1038/s41418-024-01289-3), 2024-04-06

Figure 1c

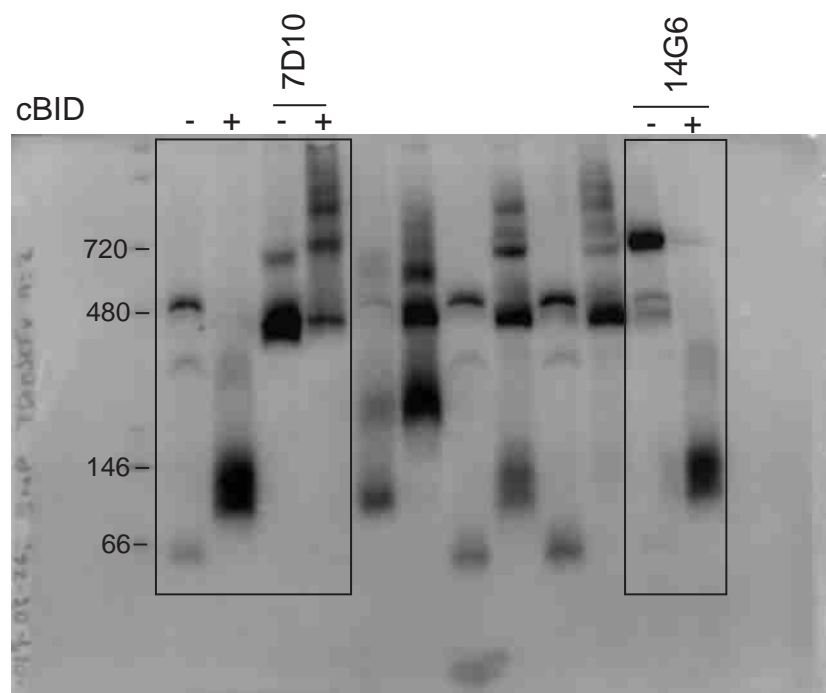

BN-PAGE,  $\alpha$ -BAK (aa22-38)

**Figure 1b**

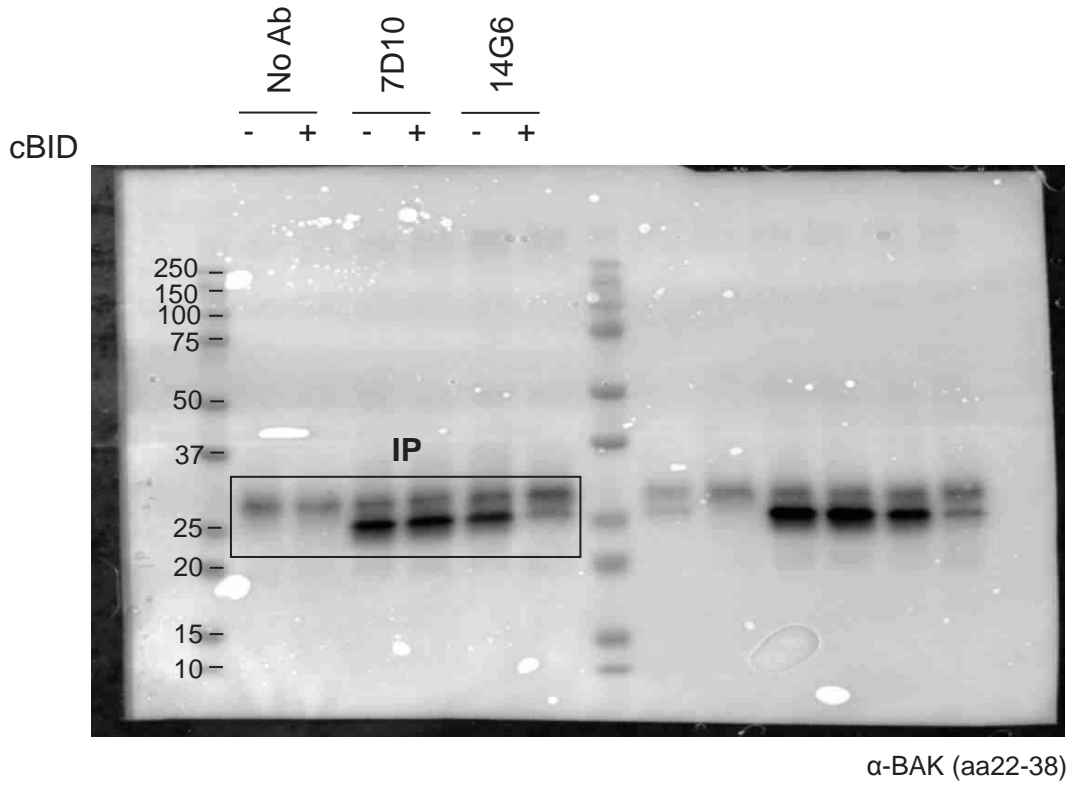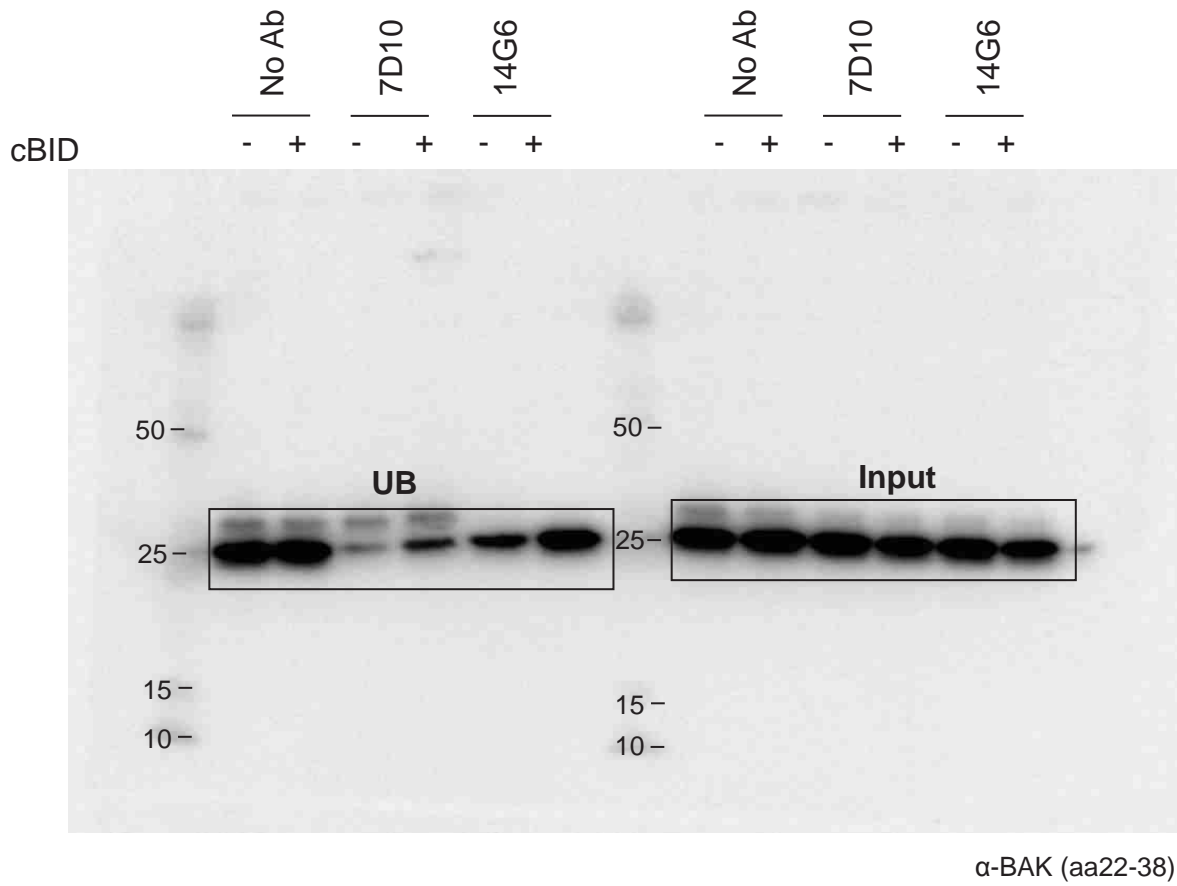

**Figure 2a, b**

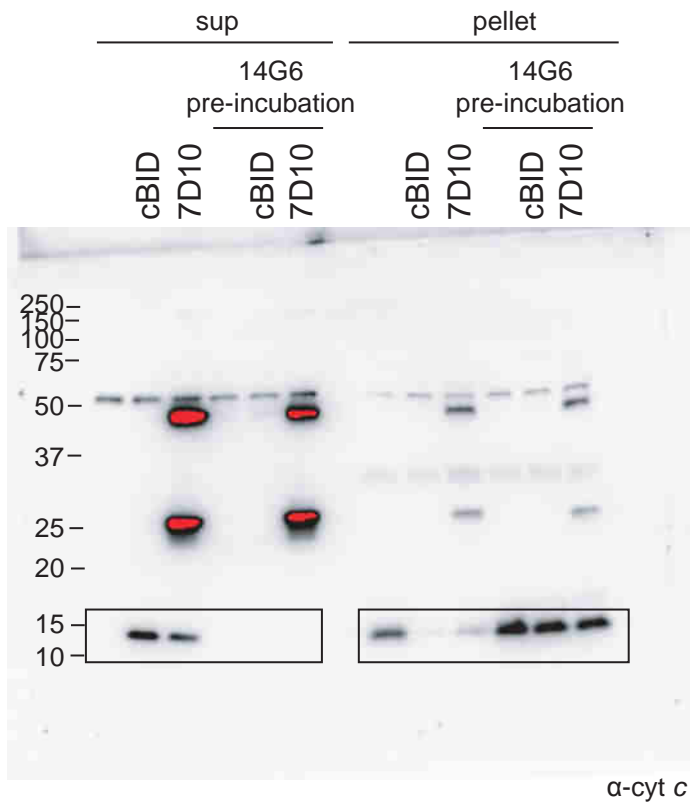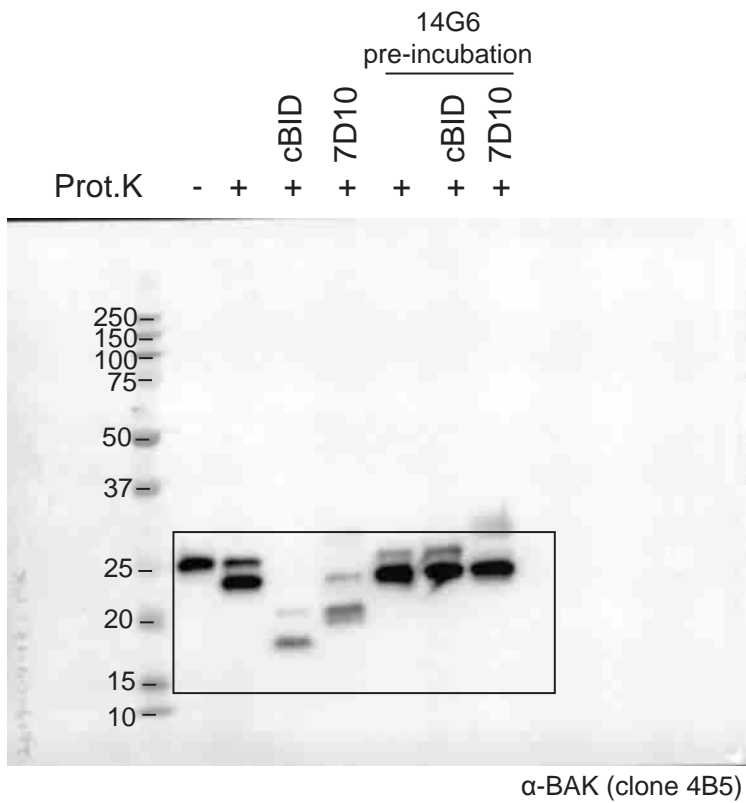

**Figure 4a**

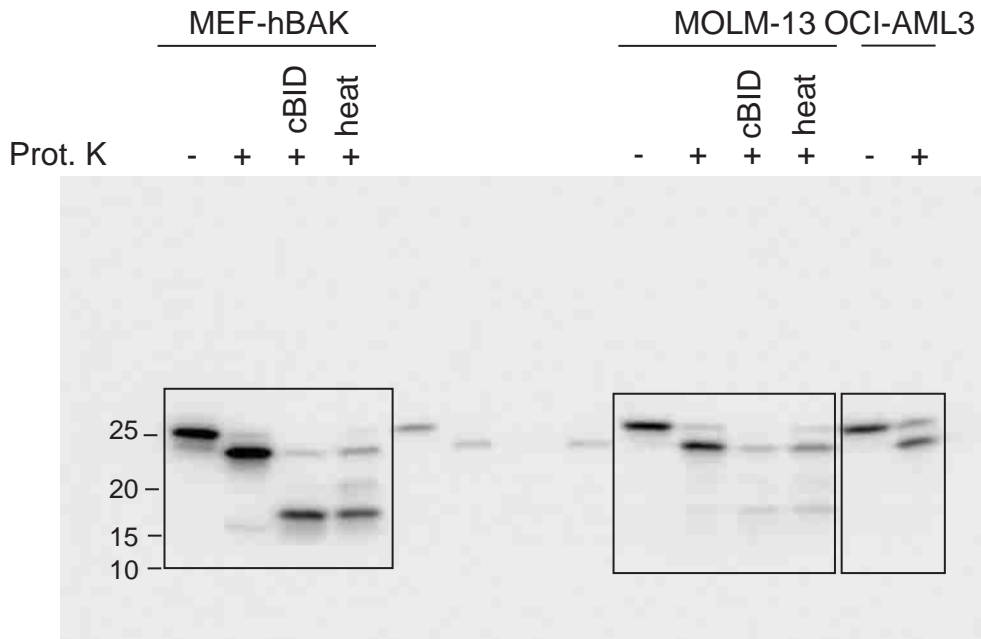

$\alpha$ -BAK (clone 4B5)

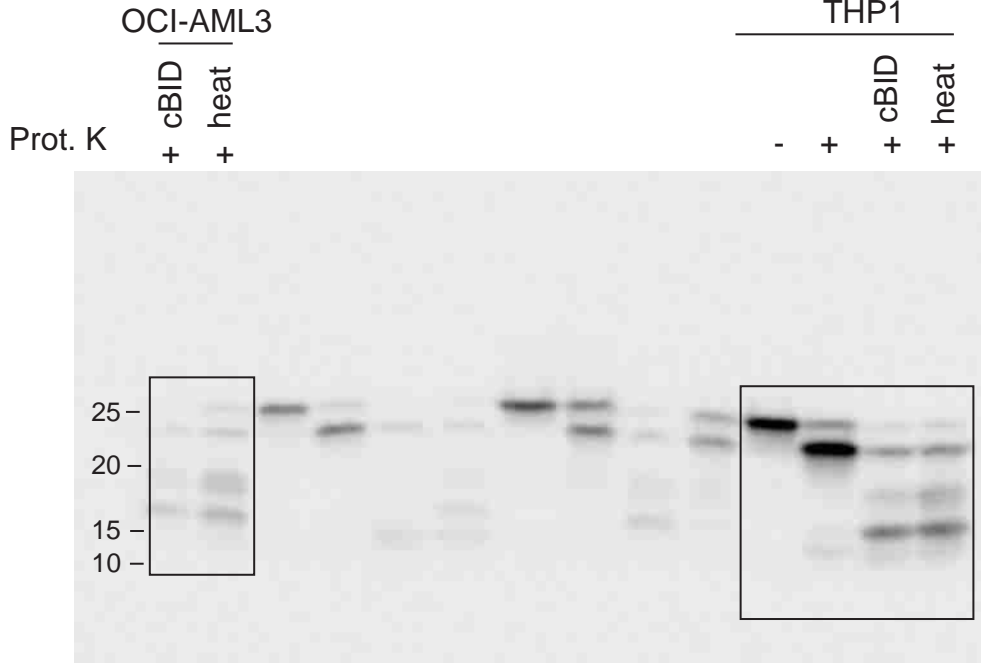

$\alpha$ -BAK (clone 4B5)



Figure 4a Cont'd

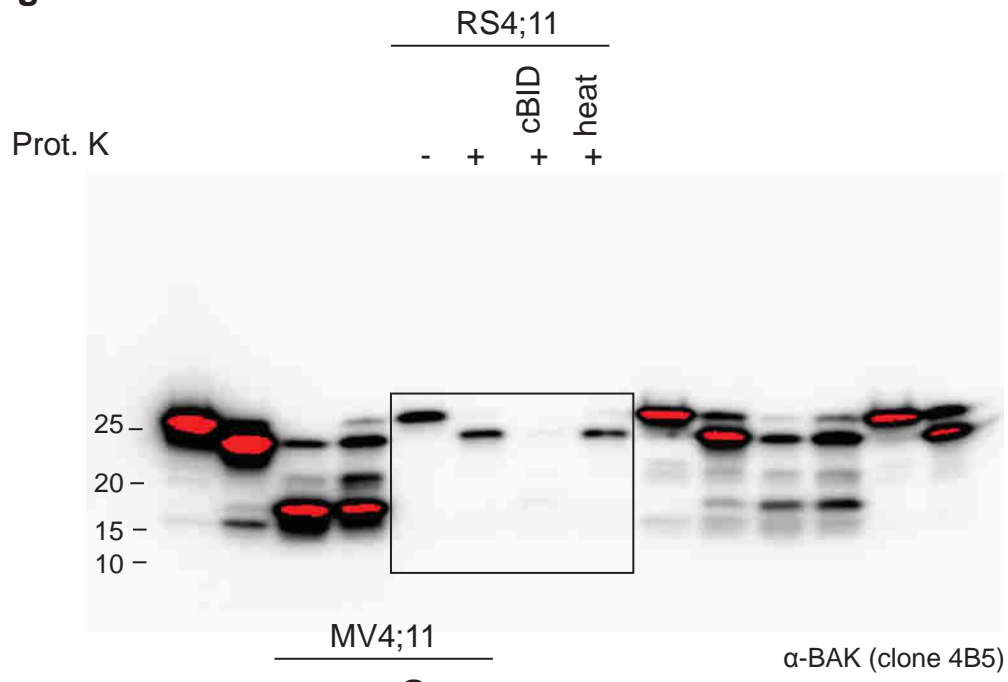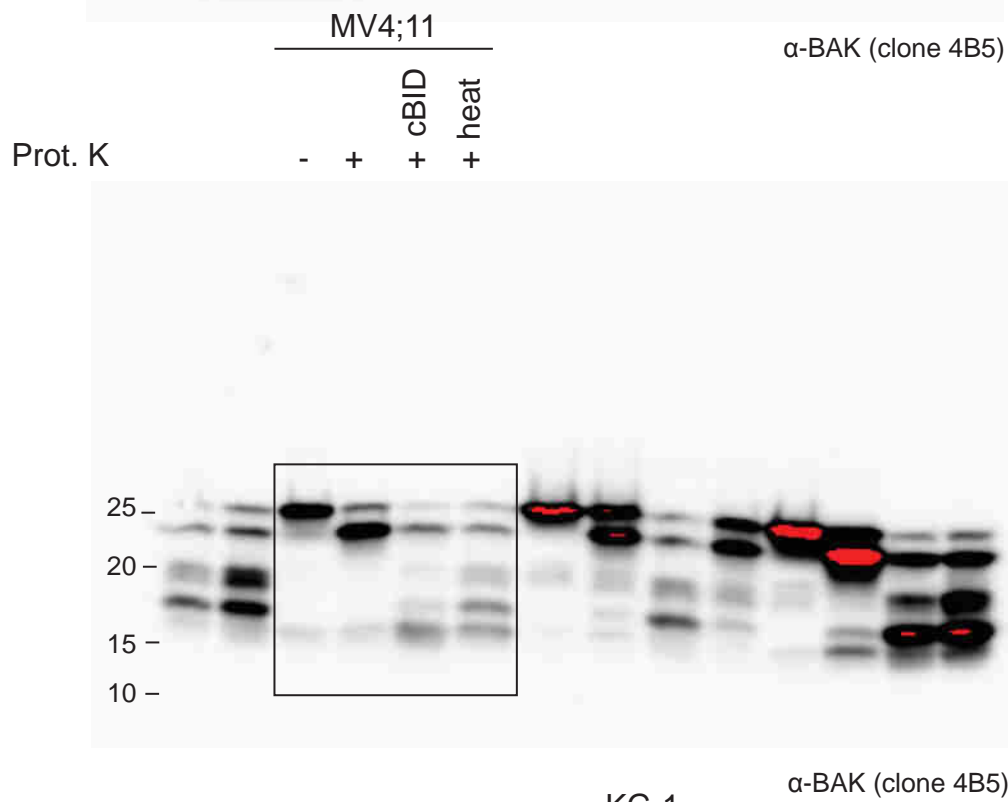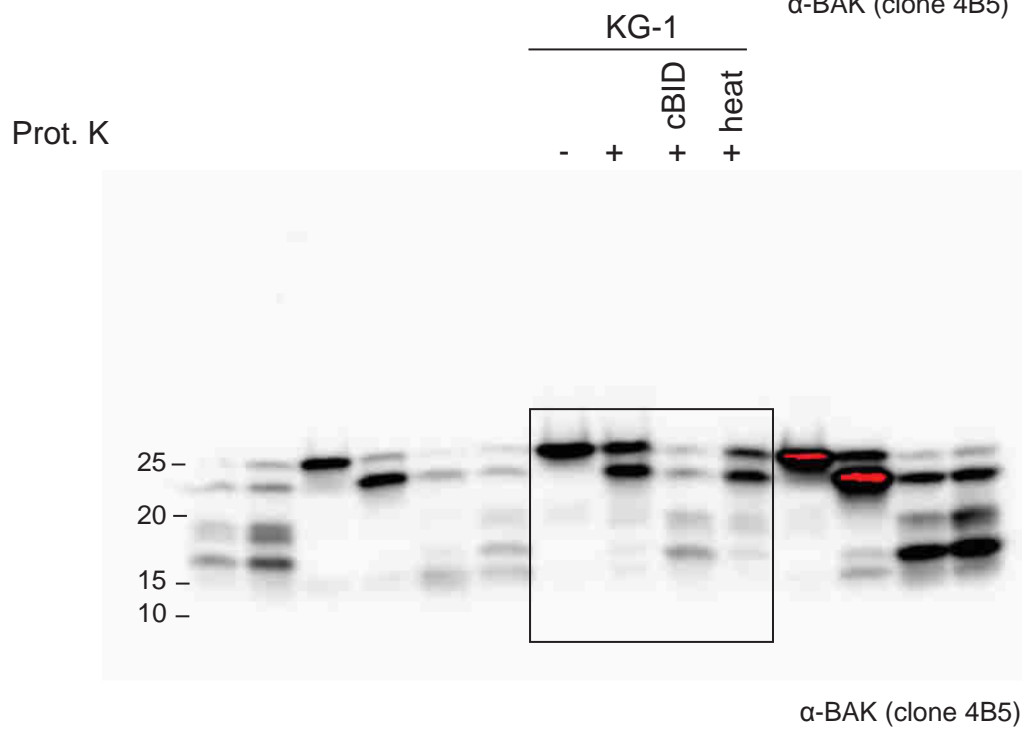

**Figure 4b**

MEF-hBAK

14G6

Unt    cBID    Unt    cBID  
-    -    +    +

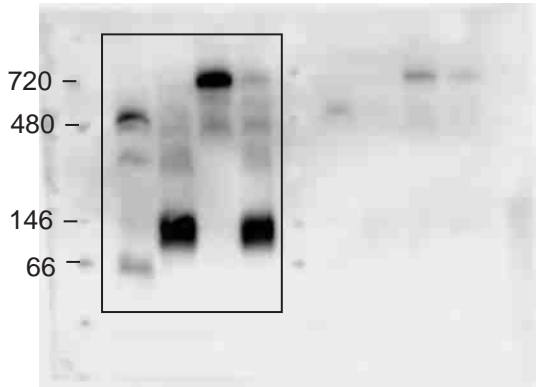

BN-PAGE,  $\alpha$ -BAK (aa22-38)

RS4;11

14G6

Unt    cBID    Unt    cBID  
-    -    +    +

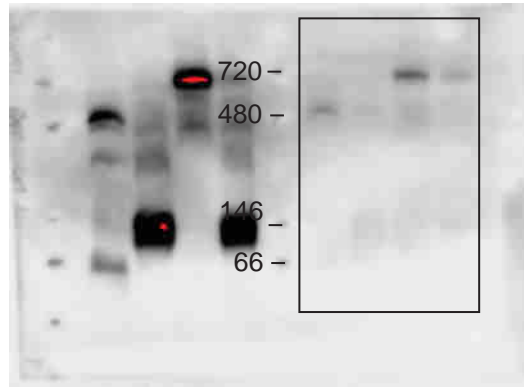

BN-PAGE,  $\alpha$ -BAK (aa22-38)

MOLM-13

OCI-AML3

14G6

Unt    cBID    Unt    cBID  
-    -    +    +

Unt    cBID    Unt    cBID  
-    -    +    +

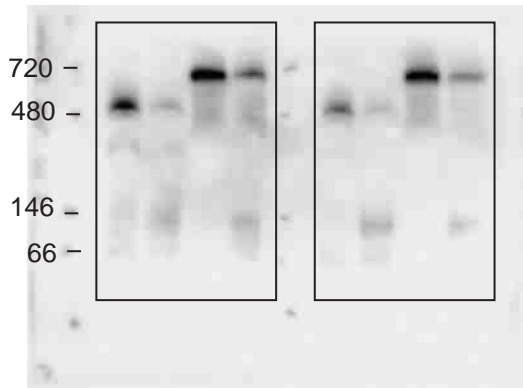

BN-PAGE,  $\alpha$ -BAK (aa22-38)

MV4;11

KG-1

14G6

Unt    cBID    Unt    cBID  
-    -    +    +

Unt    cBID    Unt    cBID  
-    -    +    +

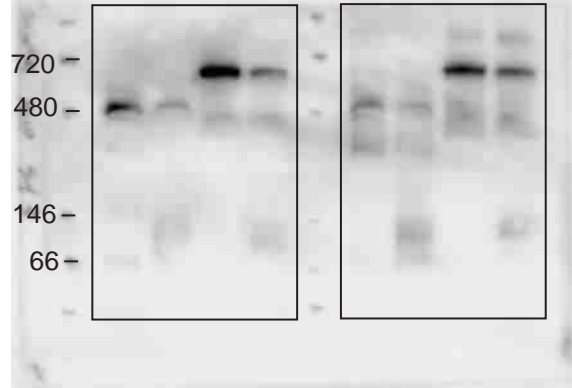

BN-PAGE,  $\alpha$ -BAK (aa22-38)

THP1

14G6

Unt    cBID    Unt    cBID  
-    -    +    +

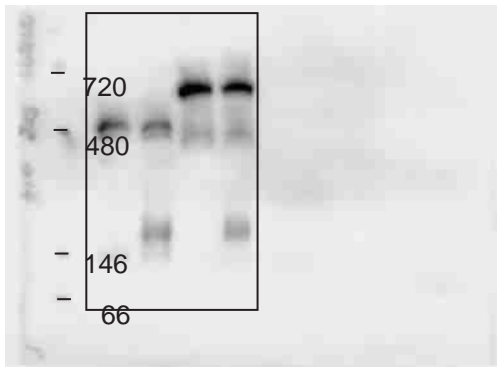

BN-PAGE,  $\alpha$ -BAK (aa22-38)

**Figure 4c**

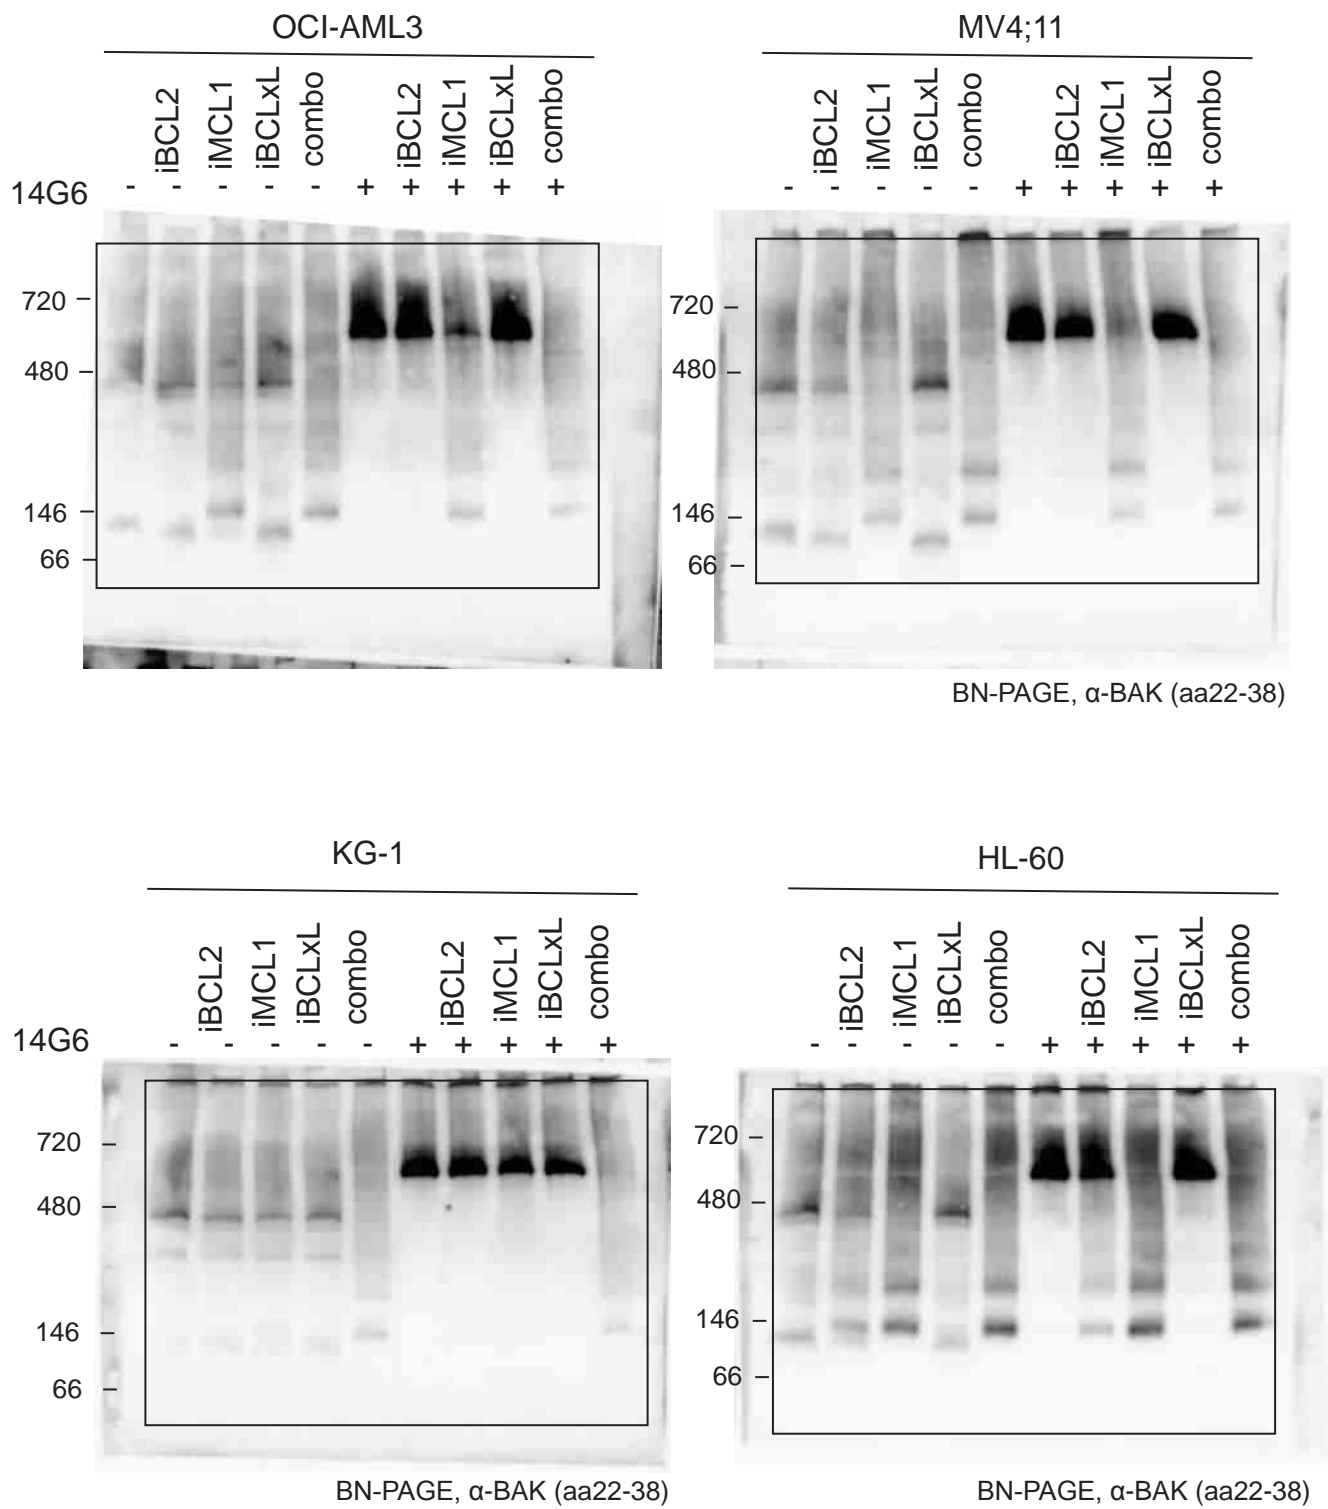

**Figure S2**

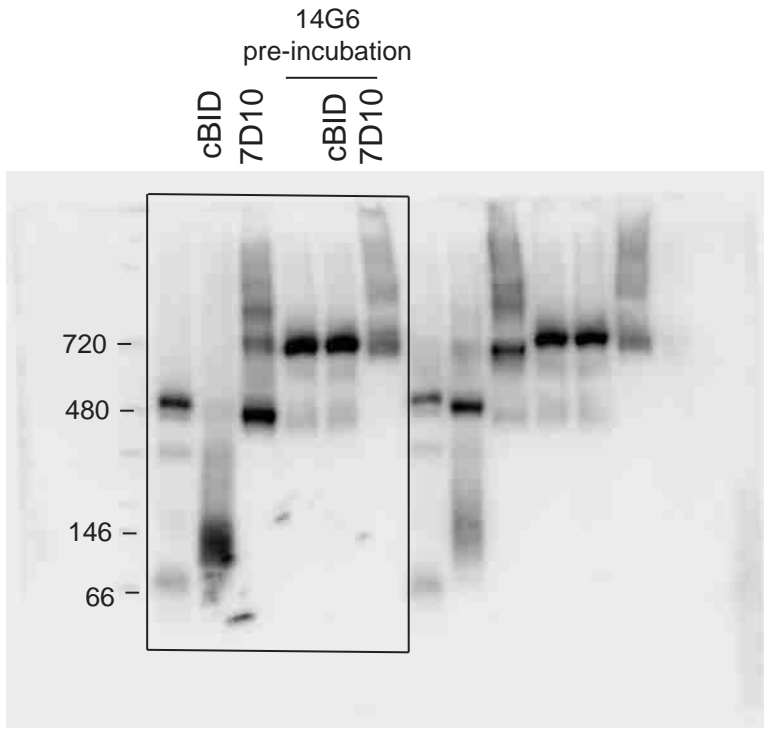

BN-PAGE,  $\alpha$ -BAK (aa22-38)

**Figure S3d**

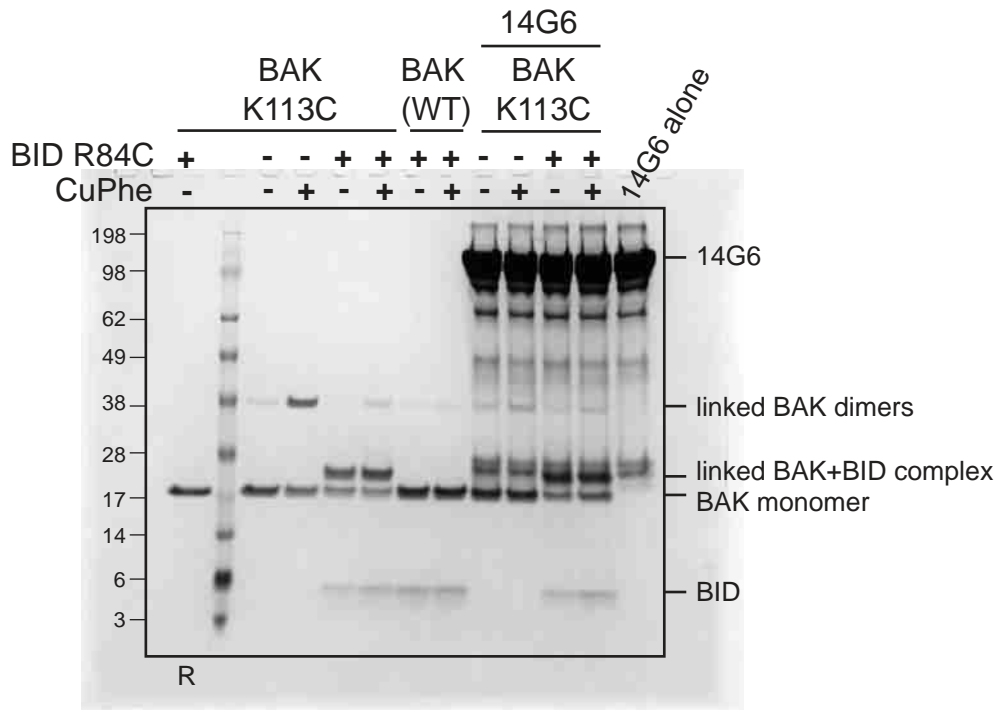

**Figure S5c**

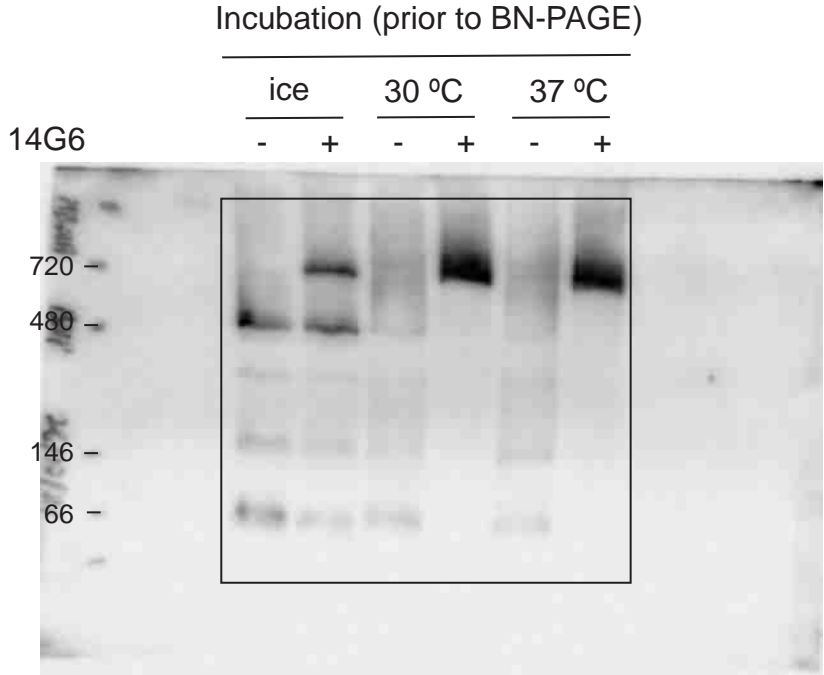

BN-PAGE,  $\alpha$ -BAK (aa22-38)

Figure S5d

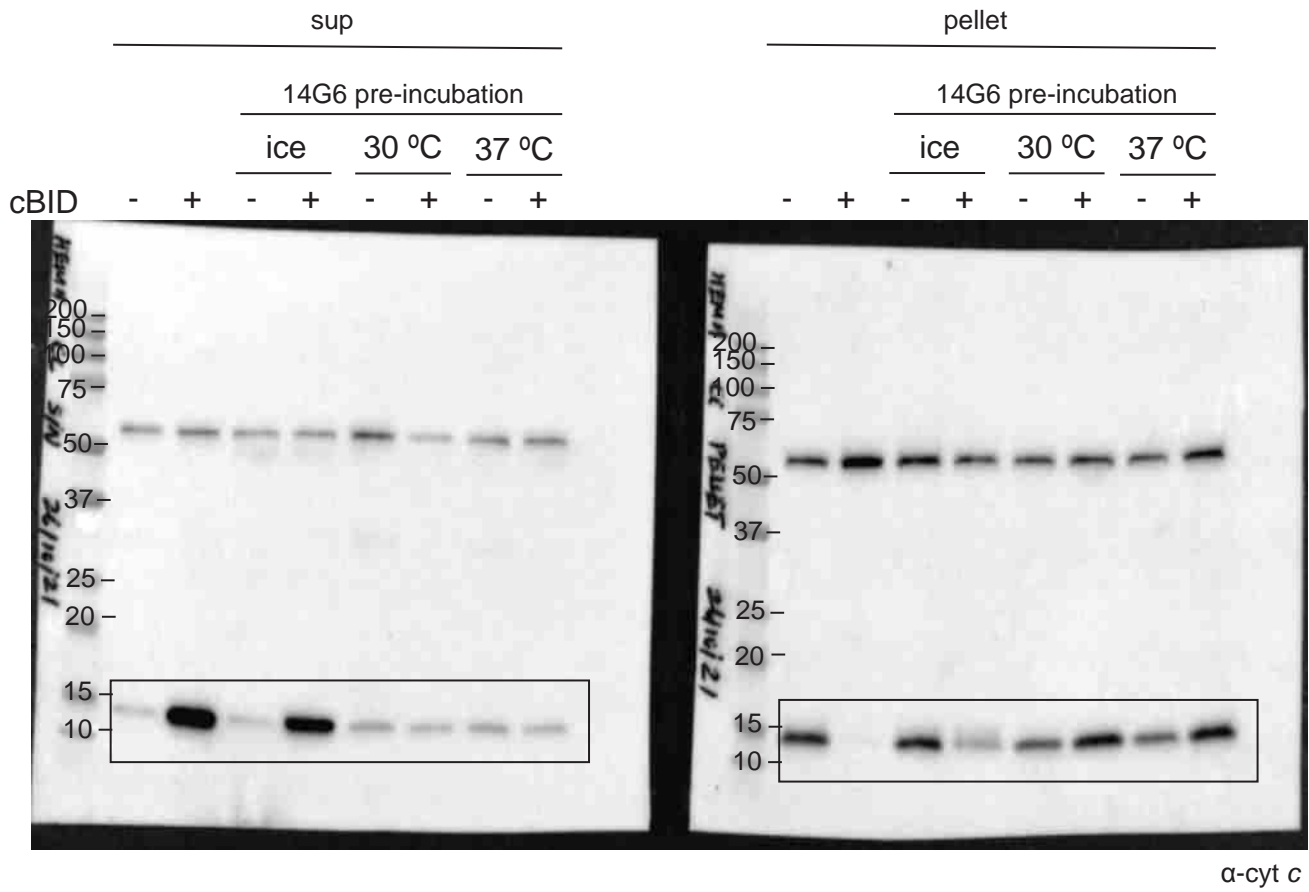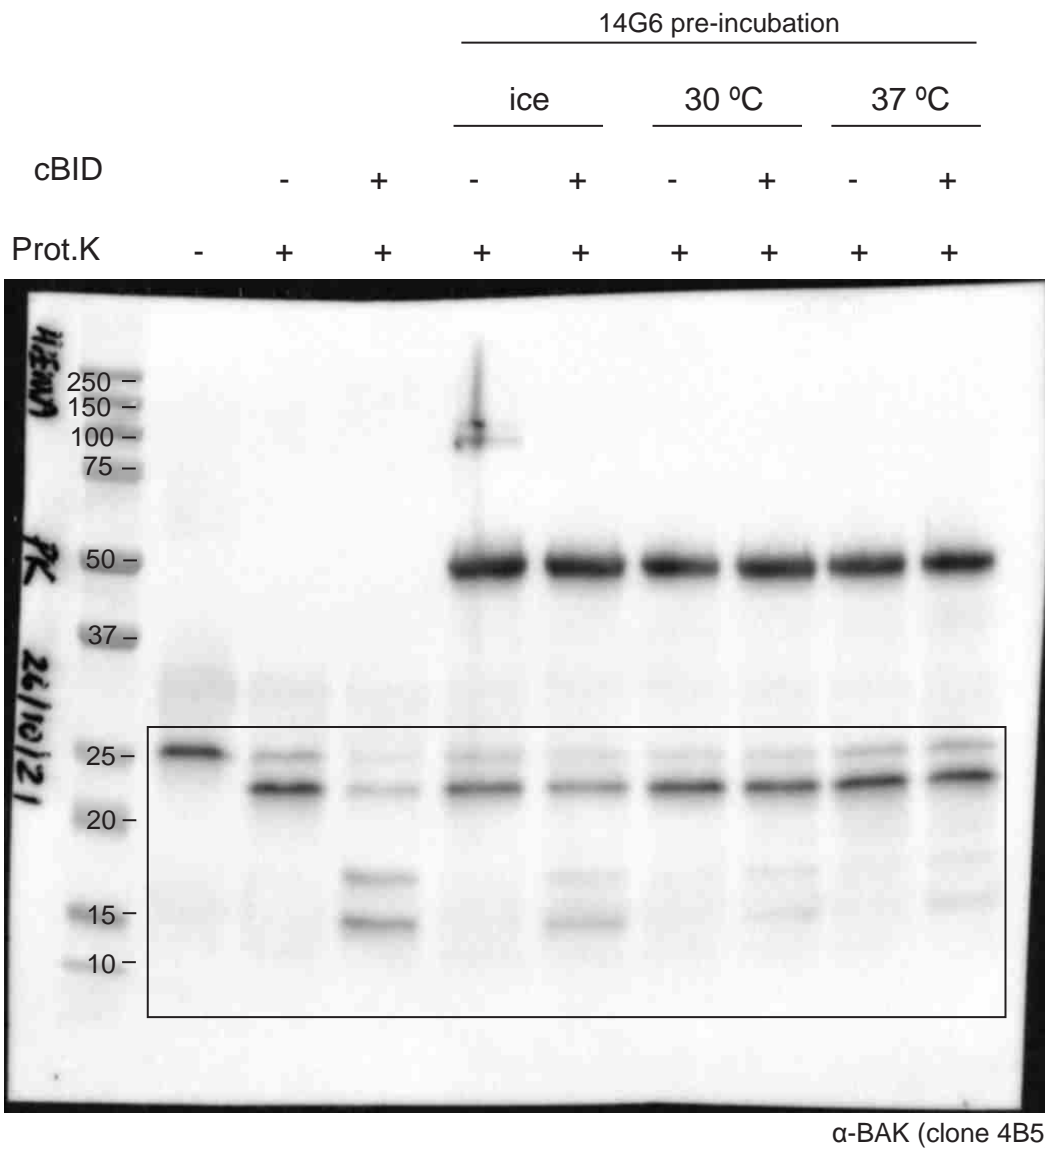

# Figure S6 (BAK)

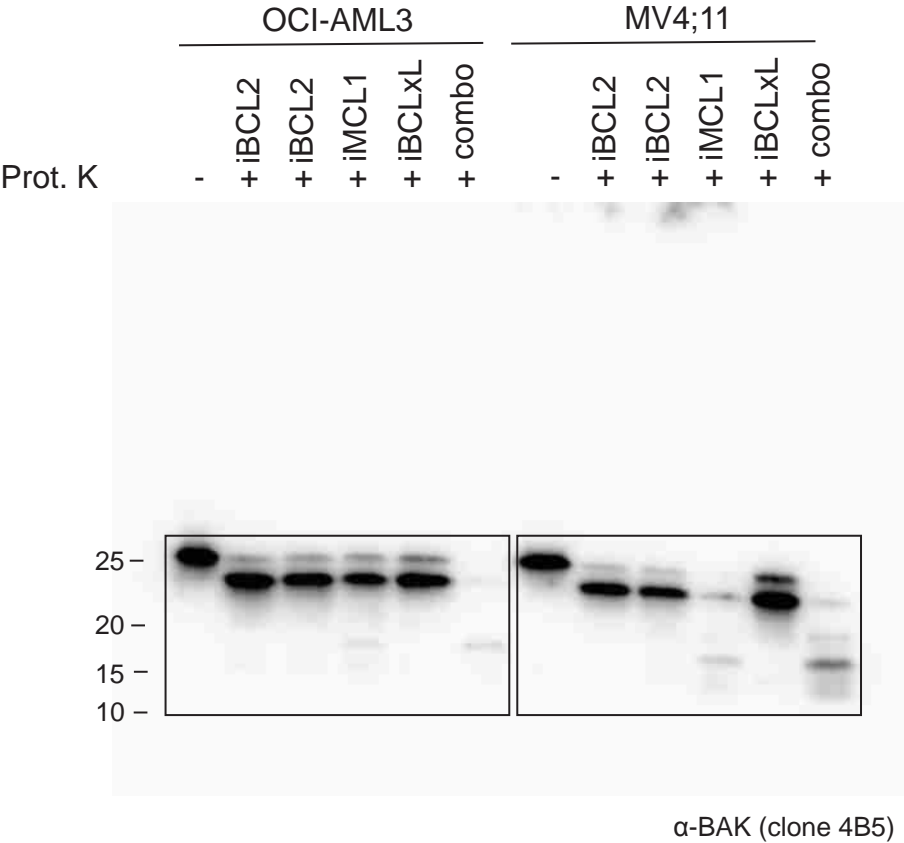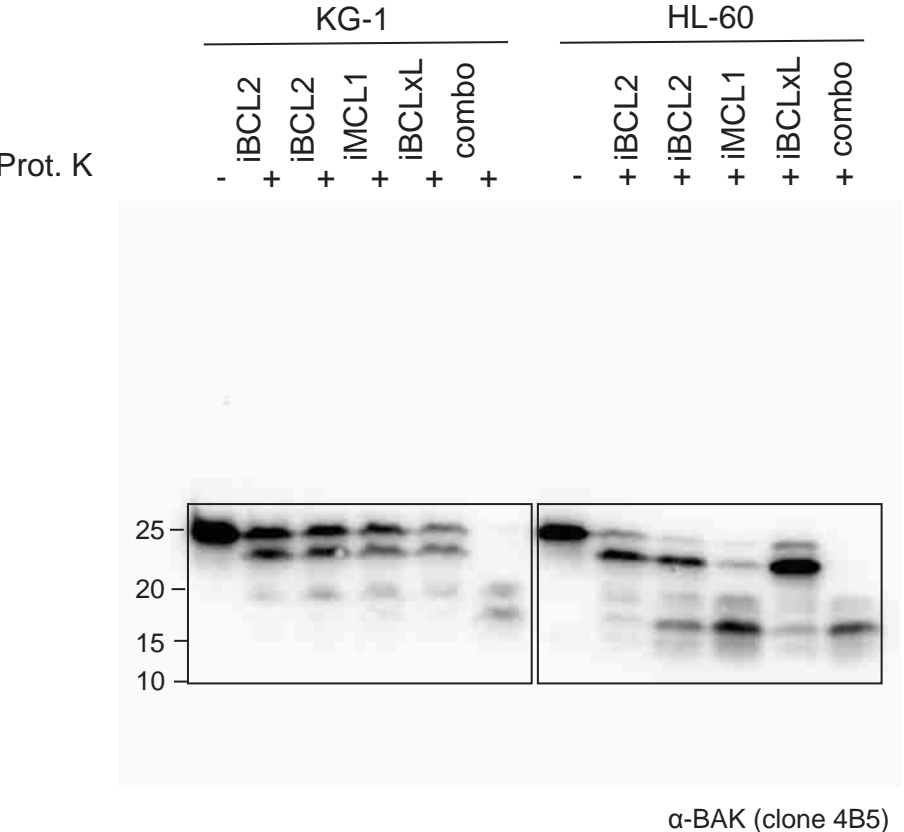



**Figure S6 (BAX)**

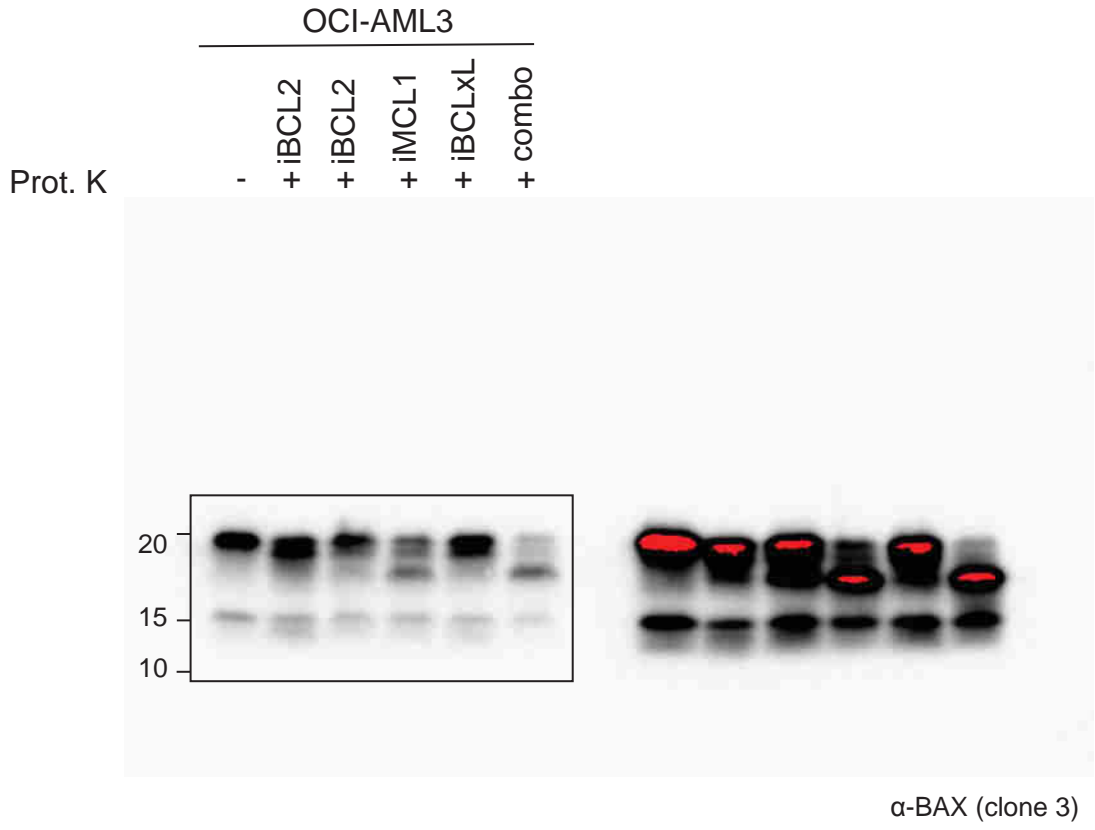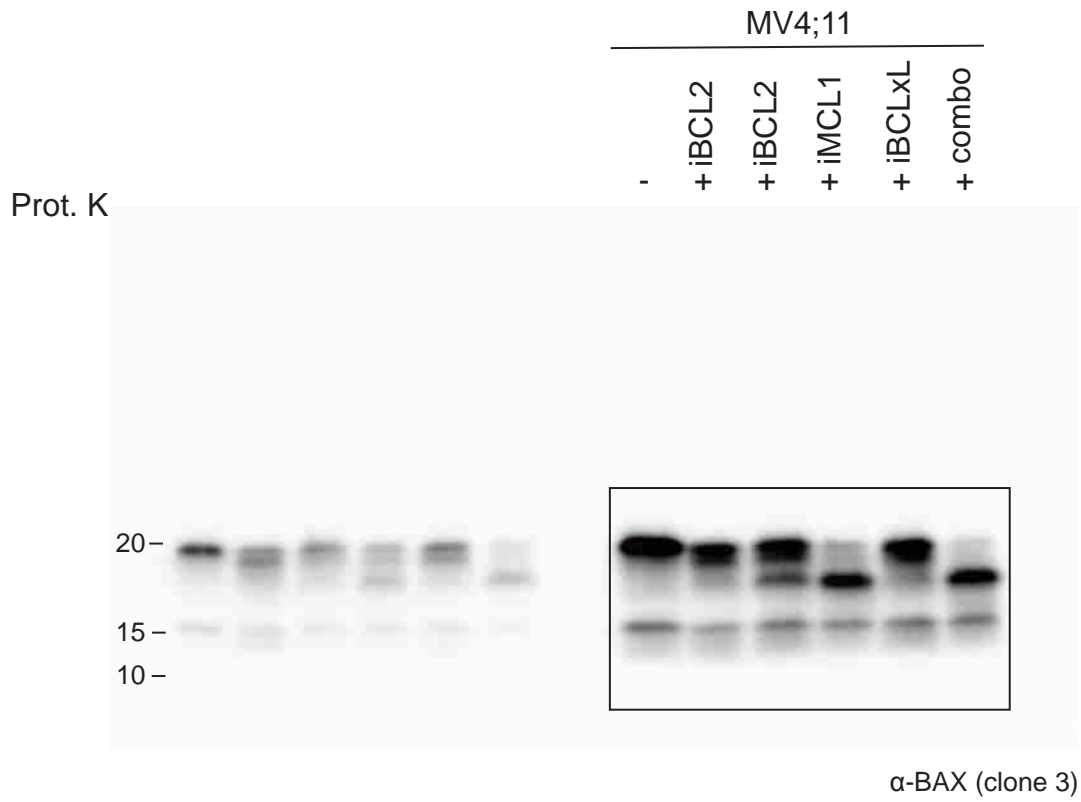

**Figure S6 (BAX) Cont'd**

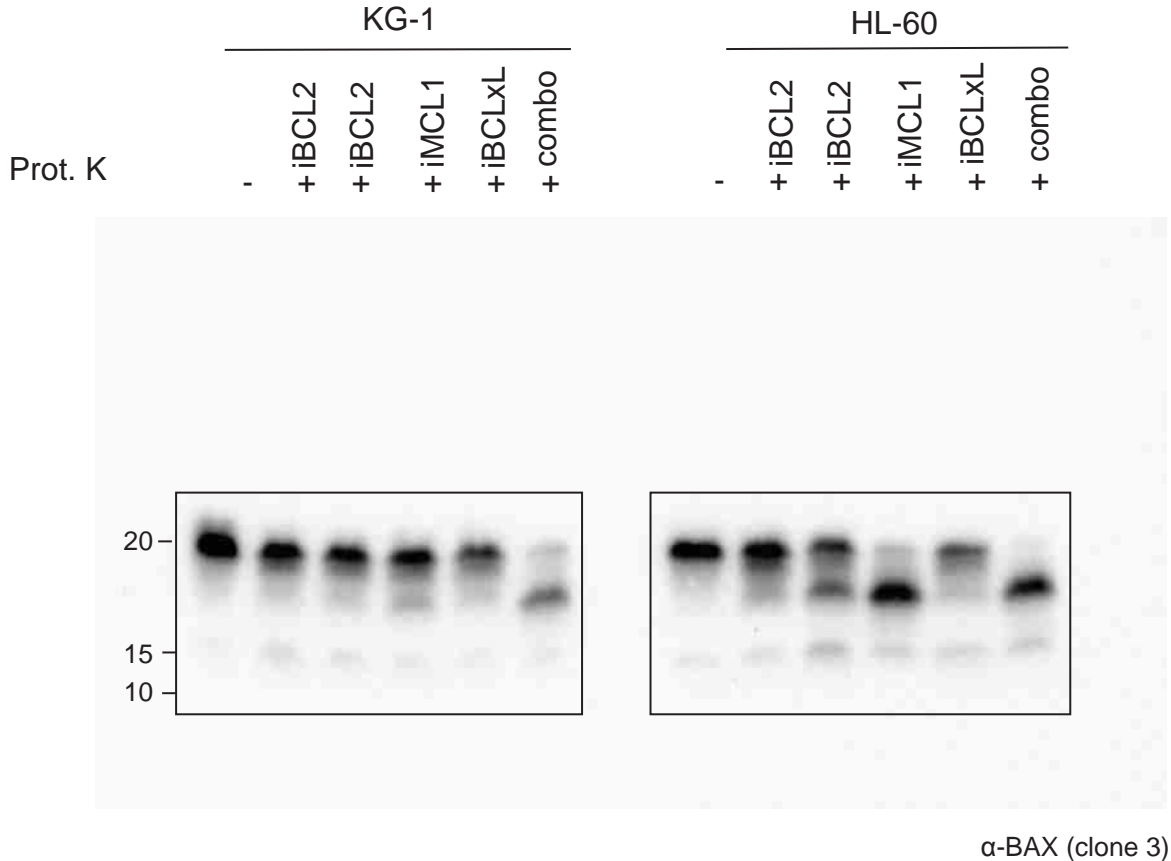

Supplement: 41418_2024_1289_MOESM2_ESM.pdf [file 41418_2024_1289_MOESM2_ESM.pdf]
